# Supplementary material
Source: publisher site journal article supplement (https://www.dovepress.com/article/225763)
Supplement: Supplementary file 1 [file get_supplementary_file.php]

**Supplementary material**

The protocol of the Chronic Kidney Disease in children prospective cohort study (CKiD) has been approved by the Institutional Review Boards of all sites which have participated in the study and they are: Arizona Kidney Disease and Hypertension Center, Boston Children’s Hospital, British Columbia Children’s Hospital, Cardinal Glennon Hospital, Case Western Reserve University/Cleveland Clinic Children’s, Children’s Healthcare of Atlanta / Emory University, Children’s Hospital of Los Angeles, Children’s Kidney Specialists Idaho, Children’s Mercy Hospital - Kansas City, Cincinnati Children’s Hospital Medical Center, LeBonheur Children’s Medical Center, Medical College of Wisconsin, Oklahoma University Health Sciences Center, Oregon Health and Science University, Phoenix Children’s Hospital, Seattle Children’s Hospital, Stanford University Medical Center, University of Alabama at Birmingham (Children’s of Alabama), University of California – Los Angeles (UCLA), University of California – San Diego (UCSD), University of California – San Francisco (UCSF), University of Manitoba (Children’s Hospital Research Institute of Manitoba), University of New Mexico Health Sciences Center, University of Wisconsin, University of Texas Southwestern Medical Center, Albert Einstein College of Medicine/Montefiore Medical Center, Ann & Robert H. Lurie Children’s Hospital of Chicago, Baylor College of Medicine (Texas Children’s Hospital), Children’s Hospital of Philadelphia, Children’s National Medical Center, Dartmouth-Hitchcock Medical Center, Driscoll Children’s Hospital, East Carolina University, Hospital for Sick Children (Sick Kids), Icahn School of Medicine at Mount Sinai, INOVA Children’s Hospital / Pediatric Specialists of Virginia, Johns Hopkins University (Johns Hopkins Children’s Center and School of Public Health), Levine Children’s Hospital, Loma Linda University, Maimonides Medical Center, Maria Fareri Children’s Hospital at Westchester, Nationwide Children’s Hospital, Nemours/Alfred l. duPont Hospital for Children, Riley Hospital for Children at Indiana University Health, Rutgers-Robert Wood Johnson Medical School, Spectrum Health Hospitals / Helen DeVos Children's Hospital, St. Joseph’s University Medical Center, State University of New York, Downstate Medical Center, Tulane University, University of Florida, University of Illinois at Chicago, University of Iowa, University of Kentucky, University of Louisville (Novak Center for Children’s Health), University of Maryland, University of Miami, University of Michigan, University of North Carolina Chapel Hill, University of Rochester Medical Center, University of Texas Health Science Center at Houston, University of Virginia, Wayne State University (Children’s Hospital of Michigan).
